# Supplementary material
Source: PubMed Central journal article supplement (PMC1325010)

$\beta$ TrCP      GAPDH

—————      —————

GFP siRNA

-    +                  -    +

$\beta$ TrCP siRNA

+    -                  +    -

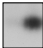

1    2

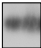

3    4

Supplement: pnas_0509927103_1.pdf [file pnas_0509927103_1.pdf]

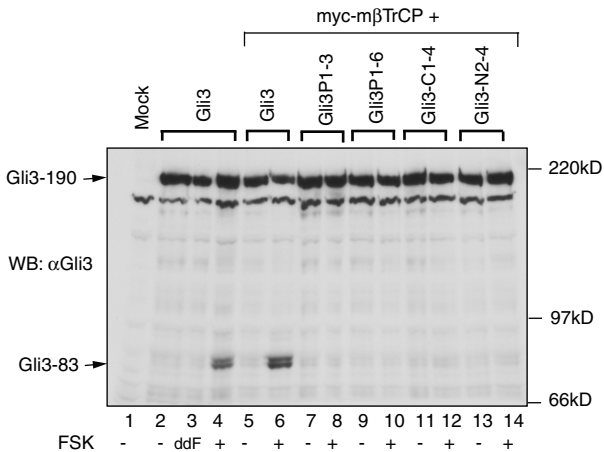

Supplement: pnas_0509927103_2.pdf [file pnas_0509927103_2.pdf]

|             |   |   |   |   |
|-------------|---|---|---|---|
| Gli3        | - | + | + | - |
| Gli3-1-1048 | + | - | - | - |
| PKA*        | + | + | - | - |

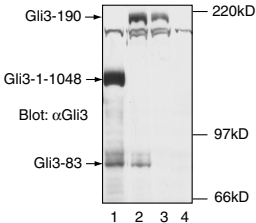

Supplement: pnas_0509927103_3.pdf [file pnas_0509927103_3.pdf]
